# Supplementary material for: Two-Stage Revision Total Knee Arthroplasty in Cases of Periprosthetic Joint Infection: An Analysis of 50 Cases
Source: PubMed Central journal article supplement — Open Orthop J. 2015 Feb 27;9:49–56. doi: 10.2174/1874325001509010049 (PMC4415200; doi:10.2174/1874325001509010049), 2015-02-27
Supplement: TOORTHJ-9-49_SD1.pdf [file TOORTHJ-9-49_SD1.pdf]

## SUPPLEMENTARY MATERIAL

### Two-Stage Revision Total Knee Arthroplasty in Cases of Periprosthetic Joint Infection: An Analysis of 50 Cases

Leif Claassen<sup>\*</sup>, Christian Plaass, Kiriakos Daniilidis, Tilman Calliess and Gabriela von Lewinski

*Orthopedic department of the Hannover Medical School, Hannover, Germany*

#### Correlation of indication parameters with intraoperative findings

| Patient Number | Patient History                                                                                             | Clinical Appearance                          | Diagnostic Findings                                                | Intraoperative Appearance                             | Intraoperative Finding of Microorganism                        |
|----------------|-------------------------------------------------------------------------------------------------------------|----------------------------------------------|--------------------------------------------------------------------|-------------------------------------------------------|----------------------------------------------------------------|
| 1              | One previous septic revision arthroplasty                                                                   | Swelling, redness, elevated body temperature | Staphylococcus epidermidis in diagnostic aspiration                | Purulence                                             | Staphylococcus epidermidis multidrug-resistant                 |
| 2              | No local infection, chronic osteomyelitis of the opposite foot                                              | Swelling, redness                            | Staphylococcus aureus in diagnostic aspiration, CRP 29 mg/dl       | Purulence                                             | Staphylococcus aureus                                          |
| 3              | Two times arthroscopic lavage in an external hospital with verification of MRSA                             | No cardinal signs of inflammation            | CRP 12.4 mg/dl                                                     | Purulence                                             | MRSA                                                           |
| 4              | Wound healing disorder after primary TKA with performed revision with verification of Staphylococcus aureus | Persistent wound secretion, redness          | CRP 3.5 mg/dl                                                      | Purulence                                             | Staphylococcus epidermidis                                     |
| 5              | No infection                                                                                                | No cardinal signs of inflammation            | CRP 1.7 mg/dl, negative diagnostic aspiration                      | Suspect scarred tissue<br>Assumed low-grade infection | No verified microorganism, but signs of infection in histology |
| 6              | No infection                                                                                                | Swelling, redness, elevated body temperature | Purulence in diagnostic aspiration, CRP 35.4 mg/dl                 | Purulence                                             | Staphylococcus epidermidis                                     |
| 7              | 1 one-stage revision arthroplasty, one revision with verification of Enterococcus faecalis                  | Swelling, redness, elevated body temperature | CRP 26.2 mg/dl                                                     | Purulence                                             | Enterococcus faecalis                                          |
| 8              | No infection                                                                                                | Swelling, redness, elevated body temperature | CRP 10.2 mg/dl                                                     | Purulence                                             | E. coli<br>MRSA                                                |
| 9              | No infection                                                                                                | Swelling, redness, elevated body temperature | CRP 1.9 mg/dl, Staphylococcus epidermidis in diagnostic aspiration | Purulence                                             | Staphylococcus epidermidis                                     |

| Patient Number | Patient History                                                                                            | Clinical Appearance                                 | Diagnostic Findings                                                                                                    | Intraoperative Appearance                                 | Intraoperative Finding of Microorganism                               |
|----------------|------------------------------------------------------------------------------------------------------------|-----------------------------------------------------|------------------------------------------------------------------------------------------------------------------------|-----------------------------------------------------------|-----------------------------------------------------------------------|
| 10             | No infection                                                                                               | No cardinal signs of inflammation                   | Normal serum inflammatory markers, negative diagnostic aspiration                                                      | <b>Suspect scarred tissue Assumed low-grade infection</b> | <b>Staphylococcus epidermidis</b>                                     |
| 11             | No infection                                                                                               | No cardinal signs of inflammation                   | Normal serum inflammatory markers, negative diagnostic aspiration                                                      | <b>Suspect scarred tissue Assumed low-grade infection</b> | No verified microorganism, no signs of infection in histology         |
| 12             | 1 septic revision arthroplasty                                                                             | Swelling, redness                                   | Streptococcus intermedius in diagnostic aspiration                                                                     | <b>Purulence</b>                                          | <b>Staphylococcus capitis</b>                                         |
| 13             | No infection                                                                                               | No cardinal signs of inflammation                   | Normal serum inflammatory markers, negative diagnostic aspiration                                                      | <b>Suspect scarred tissue Assumed low-grade infection</b> | No verified microorganism, no signs of infection in histology         |
| 14             | 4 times revision arthroplasty, one time septic                                                             | <b>Swelling, redness, elevated body temperature</b> | <b>Normal serum inflammatory markers, signs of infection in bone scintigraphy</b>                                      | Suspect scarred tissue                                    | <b>Streptococcus agalactiae</b>                                       |
| 15             | No infection                                                                                               | No cardinal signs of inflammation                   | Normal serum inflammatory markers                                                                                      | <b>Suspect scarred tissue Assumed low-grade infection</b> | No verified microorganism, no signs of infection in histology         |
| 16             | No infection                                                                                               | No cardinal signs of inflammation                   | Normal serum inflammatory markers                                                                                      | <b>Suspect scarred tissue Assumed low-grade infection</b> | No verified microorganism, no signs of infection in histology         |
| 17             | Previous one-stage revision arthroplasty, persistent wound healing disorder with secretion and sinus tract | Swelling, redness, wound secretion                  | CRP 5.6 mg/dl                                                                                                          | <b>Purulence sinus tract</b>                              | <b>Staphylococcus aureus</b>                                          |
| 18             | One septic revision arthroplasty                                                                           | <b>Swelling, redness, elevated body temperature</b> | <b>CRP 1.5 mg/dl, signs of infection in bone scintigraphy</b>                                                          | Purulence                                                 | <b>Staphylococcus aureus</b>                                          |
| 19             | 3 times revision arthroplasty, signs of infection in diagnostic aspiration of external hospital            | No cardinal signs of inflammation                   | No signs of infection                                                                                                  | <b>Suspect scarred tissue Assumed low-grade infection</b> | No verified microorganism, no signs of infection in histology         |
| 20             | One-stage revision arthroplasty                                                                            | No cardinal signs of inflammation                   | Normal serum inflammatory markers, negative diagnostic aspiration, signs of infection in bone scintigraphy             | <b>Purulence</b>                                          | <b>Staphylococcus epidermidis<br/>Micrococcus luteus</b>              |
| 21             | Over 60 previous operations, one septic revision arthroplasty                                              | <b>Swelling, redness, elevated body temperature</b> | <b>Normal serum inflammatory markers, negative diagnostic aspiration, signs of infection in leukocyte scintigraphy</b> | Purulence                                                 | No verified microorganism, but <b>signs of infection in histology</b> |

| Patient Number | Patient History                                                                                              | Clinical Appearance                          | Diagnostic Findings                                                                                           | Intraoperative Appearance                             | Intraoperative Finding of Microorganism                                                        |
|----------------|--------------------------------------------------------------------------------------------------------------|----------------------------------------------|---------------------------------------------------------------------------------------------------------------|-------------------------------------------------------|------------------------------------------------------------------------------------------------|
| 22             | One-stage revision arthroplasty                                                                              | No cardinal signs of inflammation            | No signs of infection                                                                                         | Suspect scarred tissue, Purulence                     | <b>Staphylococcus epidermidis</b><br><b>Propionibacterium acnes</b><br><b>Bacillus species</b> |
| 23             | No infection                                                                                                 | No cardinal signs of inflammation            | Normal serum inflammatory markers                                                                             | Suspect scarred tissue<br>Assumed low-grade infection | No verified microorganism, no signs of infection in histology                                  |
| 24             | One-stage revision arthroplasty                                                                              | Swelling, redness, elevated body temperature | Normal serum inflammatory markers, negative diagnostic aspiration, signs of infection in bone scintigraphy    | Suspect scarred tissue                                | No verified microorganism, no signs of infection in histology                                  |
| 25             | One-stage revision arthroplasty                                                                              | No cardinal signs of inflammation            | Normal serum inflammatory markers, no signs of infection in bone scintigraphy                                 | Suspect scarred tissue<br>Assumed low-grade infection | No verified microorganism, no signs of infection in histology                                  |
| 26             | No infection                                                                                                 | No cardinal signs of inflammation            | Normal serum inflammatory markers, negative diagnostic aspiration, no signs of infection in bone scintigraphy | Suspect scarred tissue<br>Assumed low-grade infection | No verified microorganism, no signs of infection in histology                                  |
| 27             | No infection                                                                                                 | No cardinal signs of inflammation            | Normal serum inflammatory markers, negative diagnostic aspiration, signs of infection in bone scintigraphy    | Suspect scarred tissue<br>Assumed low-grade infection | No verified microorganism, no signs of infection in histology                                  |
| 28             | One-stage revision arthroplasty                                                                              | Hotness, redness, pain, swelling             | CRP 1.0 mg/dl, negative diagnostic aspiration, signs of infection in bone scintigraphy                        | Suspect scarred tissue                                | <b>Staphylococcus capitis</b>                                                                  |
| 29             | No infection                                                                                                 | Swelling, redness, elevated body temperature | CRP 7.9 mg/dl                                                                                                 | Purulence                                             | <b>Streptococcus agalactiae</b>                                                                |
| 30             | One-stage revision arthroplasty                                                                              | Hotness, redness, pain, swelling             | CRP 0.9 mg/dl, negative diagnostic aspiration, signs of infection in bone scintigraphy                        | Purulence                                             | <b>Enterococcus faecalis</b>                                                                   |
| 31             | No infection                                                                                                 | Hotness, redness, pain, swelling             | CRP 4.0 mg/dl, negative diagnostic aspiration, signs of infection in bone scintigraphy                        | Suspect scarred tissue, Purulence                     | <b>Staphylococcus epidermidis</b>                                                              |
| 32             | Performed arthroscopic lavage in an external hospital with verification of <b>Staphylococcus epidermidis</b> | Hotness, redness, pain, swelling             | CRP 2.4 mg/dl                                                                                                 | Purulence                                             | <b>Staphylococcus epidermidis</b>                                                              |

| Patient Number | Patient History                                                         | Clinical Appearance                                                | Diagnostic Findings                                                                                                  | Intraoperative Appearance                                 | Intraoperative Finding of Microorganism                               |
|----------------|-------------------------------------------------------------------------|--------------------------------------------------------------------|----------------------------------------------------------------------------------------------------------------------|-----------------------------------------------------------|-----------------------------------------------------------------------|
| 33             | No infection                                                            | No cardinal signs of inflammation                                  | Normal serum inflammatory markers                                                                                    | <b>Suspect scarred tissue Assumed low-grade infection</b> | No verified microorganism, no signs of infection in histology         |
| 34             | No infection                                                            | <b>Hotness, redness, pain, swelling</b>                            | <b>CRP 1.1 mg/dl, negative diagnostic aspiration, no signs of infection in bone scintigraphy</b>                     | No signs of infection                                     | No verified microorganism, no signs of infection in histology         |
| 35             | Revision with signs of infection in histology                           | <b>Hotness, redness, pain, swelling, elevated body temperature</b> | <b>CRP 12.4 mg/dl</b>                                                                                                | Purulence                                                 | <b>Propionibacterium acnes</b>                                        |
| 36             | <b>Arthroscopic lavage with verification of Propionibacterium acnes</b> | No cardinal signs of inflammation                                  | Normal serum inflammatory markers                                                                                    | Suspect scarred tissue                                    | <b>Propionibacterium acnes</b>                                        |
| 37             | No infection                                                            | No cardinal signs of inflammation                                  | Normal serum inflammatory markers                                                                                    | <b>Suspect scarred tissue, Purulence</b>                  | No verified microorganism, no signs of infection in histology         |
| 38             | No infection                                                            | No cardinal signs of inflammation                                  | Normal serum inflammatory markers                                                                                    | <b>Purulence</b>                                          | No verified microorganism, but <b>signs of infection in histology</b> |
| 39             | No infection                                                            | <b>Hotness, redness, pain, swelling, elevated body temperature</b> | <b>CRP 10.0 mg/dl</b>                                                                                                | Purulence                                                 | <b>MRSA</b>                                                           |
| 40             | One septic revision arthroplasty                                        | Hotness, redness, pain, swelling                                   | CRP 1.1 mg/dl, negative diagnostic aspiration, signs of infection in bone scintigraphy                               | <b>Purulence</b>                                          | No verified microorganism, no signs of infection in histology         |
| 41             | Erysipel previously                                                     | <b>Hotness, redness, pain, swelling, elevated body temperature</b> | <b>normal serum inflammatory markers, negative diagnostic aspiration, no signs of infection in bone scintigraphy</b> | Purulence                                                 | <b>Staphylococcus epidermidis</b>                                     |
| 42             | No infection                                                            | No cardinal signs of inflammation                                  | normal serum inflammatory markers, negative diagnostic aspiration, no signs of infection in bone scintigraphy        | <b>Suspect scarred tissue Assumed low-grade infection</b> | No verified microorganism, no signs of infection in histology         |
| 43             | One-stage revision arthroplasty                                         | No cardinal signs of inflammation                                  | normal serum inflammatory markers, negative diagnostic aspiration, no signs of infection in bone scintigraphy        | <b>Suspect scarred tissue Assumed low-grade infection</b> | No verified microorganism, no signs of infection in histology         |
| 44             | Sepsis after spondylodiscitis                                           | <b>Hotness, redness, pain, swelling, elevated body temperature</b> | <b>Diagnostic aspiration with Strept. pneumoniae CRP 42.4 mg/dl</b>                                                  | Purulence                                                 | <b>Staphylococcus aureus</b>                                          |

| Patient Number | Patient History                                                          | Clinical Appearance                                         | Diagnostic Findings                                                                                                  | Intraoperative Appearance         | Intraoperative Finding of Microorganism                            |
|----------------|--------------------------------------------------------------------------|-------------------------------------------------------------|----------------------------------------------------------------------------------------------------------------------|-----------------------------------|--------------------------------------------------------------------|
| 45             | Arthroscopic lavage with verification of <i>Streptococcus agalactiae</i> | Hotness, redness, pain, swelling, elevated body temperature | CRP 36 mg/dl                                                                                                         | Purulence                         | <i>E. coli</i><br><i>Streptococcus agalactiae</i>                  |
| 46             | One-stage revision arthroplasty                                          | No cardinal signs of inflammation                           | Normal serum inflammatory markers, negative diagnostic aspiration, signs of infection in bone scintigraphy           | Purulence                         | No verified microorganism, no signs of infection in histology      |
| 47             | Arthroscopic lavage with signs of infection in histology                 | Hotness, swelling                                           | Normal serum inflammatory markers, signs of infection in bone scintigraphy                                           | Suspect scarred tissue, Purulence | <i>Staphylococcus epidermidis</i><br><i>Staphylococcus warneri</i> |
| 48             | No infection                                                             | No cardinal signs of inflammation                           | Normal serum inflammatory markers, negative diagnostic aspiration, signs of infection in bone scintigraphy           | Purulence                         | No verified microorganism, no signs of infection in histology      |
| 49             | No infection                                                             | Hotness, redness, pain, swelling, elevated body temperature | CRP 5.7 mg/dl, signs of infection in diagnostic aspiration                                                           | Purulence                         | <i>Propionibacterium acnes</i>                                     |
| 50             | No infection                                                             | Hotness, redness, pain, swelling, elevated body temperature | Normal serum inflammatory markers, negative diagnostic aspiration with verification of <i>Staphylococcus capitis</i> | No manifest infection             | <i>Propionibacterium acnes</i>                                     |
